# Supplementary material
Source: PubMed Central journal article supplement (PMC6709728)
Supplement: Supp_Tables1-2.pdf [file Supp_Tables1-2.pdf]

SUPPLEMENTARY TABLE S1. MODEL FIT PARAMETERS  
FOR LCMM WITH ONE TO EIGHT CLASSES

| <i>No. of classes in model</i> | <i>Log likelihood</i> | <i>AIC</i>     | <i>BIC</i>     |
|--------------------------------|-----------------------|----------------|----------------|
| 1                              | -4448.60              | 8915.19        | 8959.77        |
| 2                              | -4412.75              | 8849.50        | 8908.93        |
| 3                              | -4347.94              | 8725.88        | 8800.17        |
| 4                              | -4342.19              | 8720.37        | 8809.52        |
| 5                              | -4325.33              | 8692.66        | <b>8796.67</b> |
| 6                              | -4315.91              | 8679.82        | 8798.69        |
| 7                              | -4311.74              | <b>8677.47</b> | 8811.20        |
| 8                              | -4311.18              | 8682.37        | 8830.95        |

Log likelihood is a measure of model fit with higher values indicating better fit. Akaike information criterion (AIC) and Bayesian information criterion (BIC) are measures of model fit taking into account model complexity, with lower values indicating the best fitting and most parsimonious model. AIC allows for slightly more complexity than BIC. The lowest AIC and BIC values – showing the best-fitting model by each of those criteria – are indicated in **bold**.

LCMM, latent class mixed models.

SUPPLEMENTARY TABLE S2. MEAN OF POSTERIOR PROBABILITIES OF MEMBERSHIP IN EACH CLASS

| <i>Class</i> | <i>Prob A1</i> | <i>Prob A2</i> | <i>Prob B1</i> | <i>Prob B2</i> | <i>Prob C1</i> | <i>Prob C2</i> | <i>Prob C3</i> |
|--------------|----------------|----------------|----------------|----------------|----------------|----------------|----------------|
| A1           | 0.65           | 0.01           | 0.05           | 0.29           | 0.00           | 0.00           | 0.00           |
| A2           | 0.08           | 0.92           | 0.00           | 0.00           | 0.00           | 0.00           | 0.00           |
| B1           | 0.07           | 0.00           | 0.71           | 0.18           | 0.04           | 0.00           | 0.00           |
| B2           | 0.14           | 0.00           | 0.02           | 0.73           | 0.03           | 0.07           | 0.00           |
| C1           | 0.00           | 0.00           | 0.08           | 0.20           | 0.72           | 0.00           | 0.00           |
| C2           | 0.01           | 0.00           | 0.00           | 0.22           | 0.01           | 0.76           | 0.00           |
| C3           | 0.00           | 0.00           | 0.00           | 0.00           | 0.00           | 0.01           | 0.99           |

Prob, probability.
